# Supplementary material for: Intermixing of MoS2 and WS2 photocatalysts toward methylene blue photodegradation
Source: publisher site journal article supplement (doi:10.3762/bjnano.15.68), 2024-07-05
Supplement: Additional file 1 [file 2190-4286-15-68-S1.pdf]

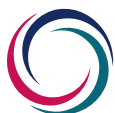

## Supporting Information

for

### Intermixing of MoS<sub>2</sub> and WS<sub>2</sub> photocatalysts toward methylene blue photodegradation

Maryam Al Qaydi, Nitul S. Rajput, Michael Lejeune, Abdellatif Bouchalkha, Mimoun El Marssi, Steevy Cordette, Chaouki Kasmi and Mustapha Jouiad

*Beilstein J. Nanotechnol.* **2024**, *15*, 817–829. [doi:10.3762/bjnano.15.68](https://doi.org/10.3762/bjnano.15.68)

## Additional figures

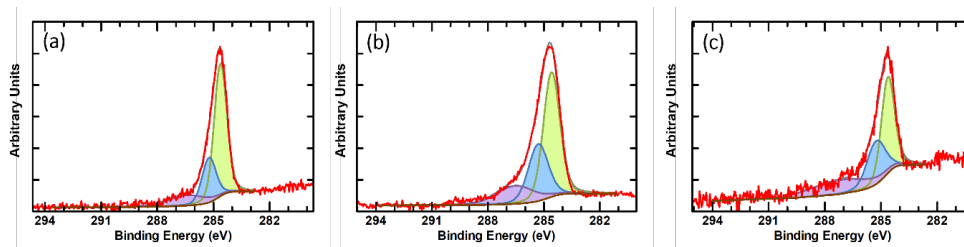

Figure S1: C 1s peaks for XPS calibration for a) MoS<sub>2</sub>, b) WS<sub>2</sub>, and c) (MoS<sub>2</sub>)<sub>x</sub>(WS<sub>2</sub>)<sub>1-x</sub> (0 ≤ x ≤ 1) samples.

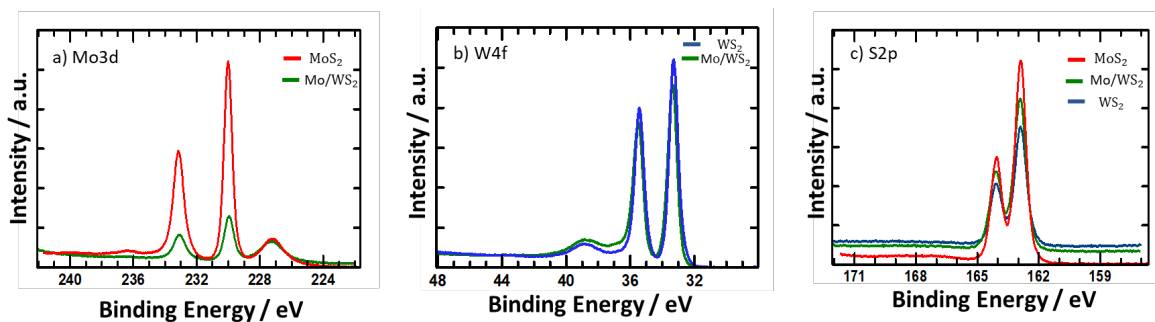

Figure S2: XPS analysis for a) MoS<sub>2</sub>/Mo<sub>3d</sub>, b) WS<sub>2</sub>/W<sub>4f</sub>, and c) S<sub>2p</sub>.

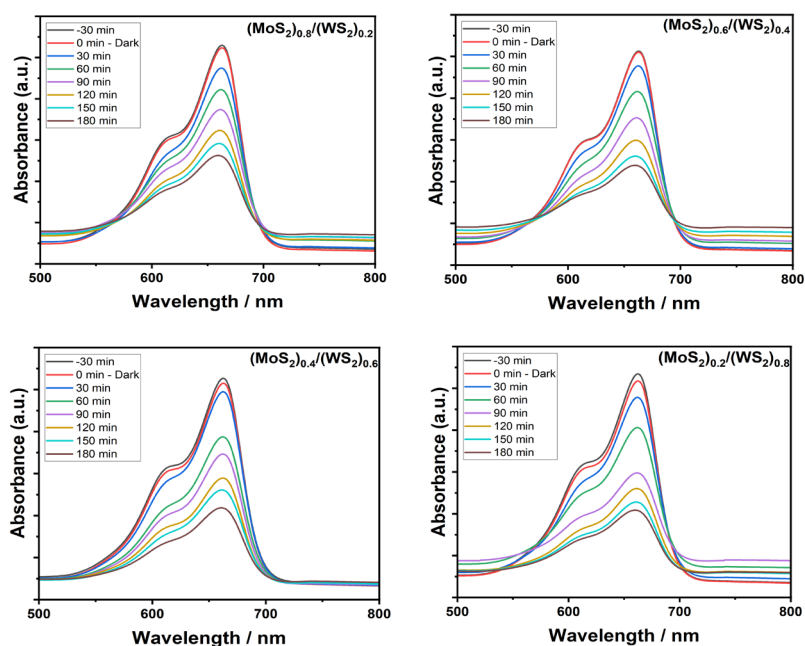

Figure S3: Photocatalysts (MoS<sub>2</sub>)<sub>x</sub>/(WS<sub>2</sub>)<sub>1-x</sub> (0 ≤ x ≤ 1); MB absorbance variation as a function of time obtained after solar simulator excitation.

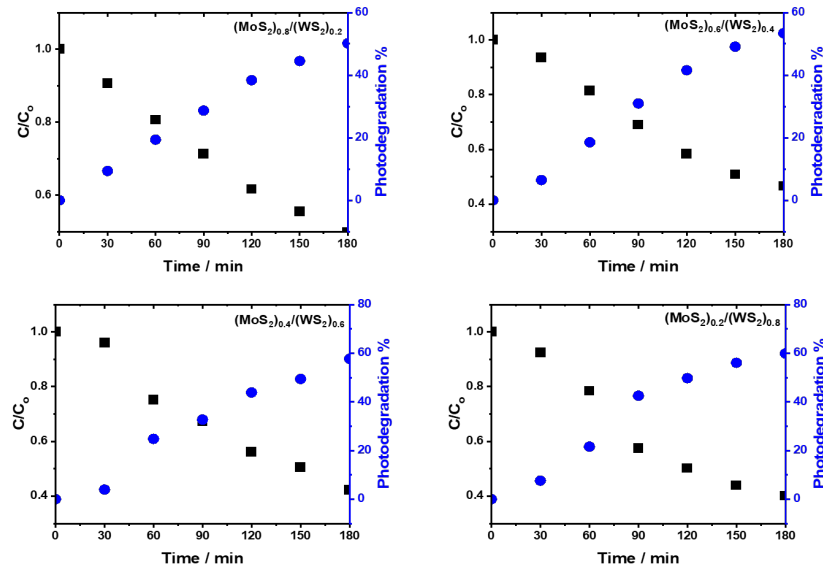

**Figure S4:** PD of MB by  $(\text{MoS}_2)_x/(\text{WS}_2)_{1-x}$  under solar simulator excitation, relative MB concentration change (black) and corresponding PD efficiency (blue).

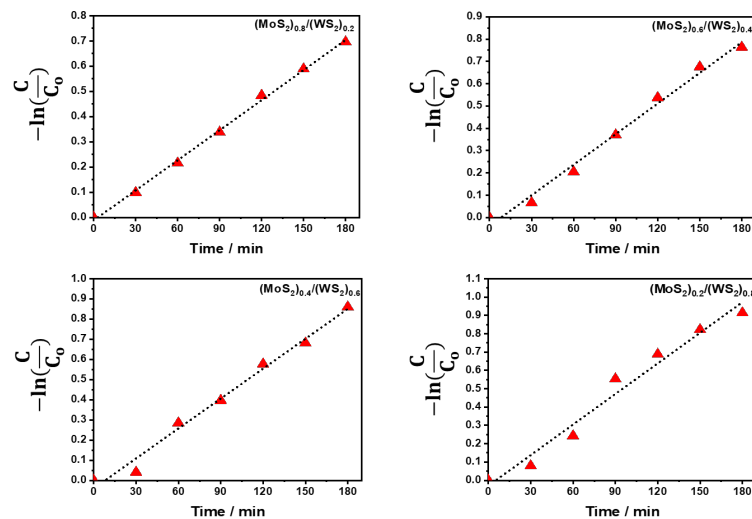

**Figure S5:** PD rate constant for  $(\text{MoS}_2)_{0.2}/(\text{WS}_2)_{0.8}$ . PD experiments carried out under direct sunlight excitation (sunny day in Amiens city, France, 25<sup>th</sup> of June 2023). Ambient temperature was about 27 °C.

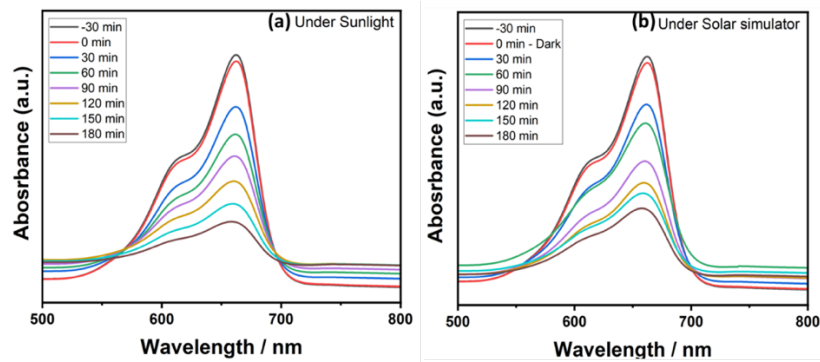

**Figure S6:** MB absorbance evolution as a function of time for photocatalysts  $(\text{MoS}_2)_{0.2}/(\text{WS}_2)_{0.8}$  after a) sunlight and b) solar simulator excitation.

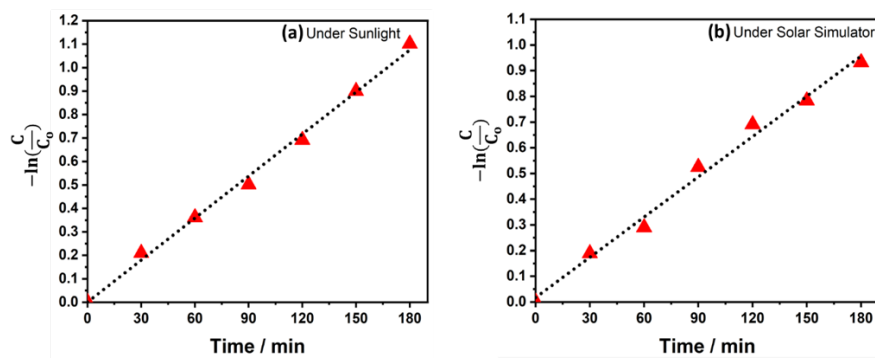

**Figure S7:** PD rate constant for  $(\text{MoS}_2)_{0.2}/(\text{WS}_2)_{0.8}$  obtained under a) sunlight and b) solar simulator.
